# Supplementary material for: Fe–Co–Ni trimetallic organic framework chrysanthemum-like nanoflowers: efficient and durable oxygen evolution electrocatalysts
Source: Royal Society of Chemistry journal article supplement (doi:10.1039/d1ta09658c), 2022-01-01
Supplement: d1ta09658c2.pdf [file d1ta09658c2.pdf]

## Supplementary Information

For

### **Fe-Co-Ni trimetallic organic framework chrysanthemum-like nanoflowers: efficient and durable oxygen evolution electrocatalysts**

Ziliang Li <sup>a</sup>, Shangkun Deng <sup>a</sup>, Hai Yu <sup>a</sup>, Zhuangzhuang Yin <sup>a</sup>, Shihan Qi <sup>a</sup>, Lei Yang <sup>c</sup>, Jianguo Lv <sup>d</sup>, Zhaoqi Sun <sup>a</sup>, Miao Zhang <sup>a,b\*</sup>

<sup>a</sup> School of Materials Science & Engineering, Anhui University, Hefei 230601, PR China

<sup>b</sup> School of physics, Energy materials and devices Key lab of Anhui province for photoelectric conversion, Anhui University, 230601

<sup>c</sup> School of Energy Materials and Chemical Engineering, Hefei University, Hefei 230601, PR China

<sup>d</sup> School of Electronic & Information Engineering, Hefei Normal University, Hefei 230601, PR China

**Table S1.** Reaction parameters for syntheses of FCN-BTC MOF, CN-BTC MOF, FN-BTC MOF, FC-BTC MOF, Fe-BTC MOF, Co-BTC MOF, and Ni-BTC MOF.

|             | FCN-BTC MOF | CN-BTC MOF | FN-BTC MOF | FC-BTC MOF | Fe-BTC MOF | Co-BTC MOF | Ni-BTC MOF |
|-------------|-------------|------------|------------|------------|------------|------------|------------|
| Molar ratio | Fe: Co: Ni  | Co: Ni =   | Fe: Ni =   | Fe: Co =   | -          | -          | -          |

\* Corresponding authors: E-mail address: [zhmiao@ahu.edu.cn](mailto:zhmiao@ahu.edu.cn) (M. Zhang).

|                                      |                            |                       |                       |                       |                       |                       |                       |
|--------------------------------------|----------------------------|-----------------------|-----------------------|-----------------------|-----------------------|-----------------------|-----------------------|
| in precursors                        | = 1:1:1                    | 1:1                   | 1:1                   | 1:1                   |                       |                       |                       |
| NiCl <sub>2</sub> .6H <sub>2</sub> O | 159 mg<br>(0.67 mmol)      | 238 mg<br>(1.00 mmol) | 238 mg<br>(1.00 mmol) | -                     | -                     | -                     | 475 mg<br>(2.00 mmol) |
| CoCl <sub>2</sub> .6H <sub>2</sub> O | 159 mg<br>(0.67 mmol)      | 238 mg<br>(1.00 mmol) | -                     | 238 mg<br>(1.00 mmol) | -                     | 476 mg<br>(2.00 mmol) | -                     |
| FeCl <sub>3</sub> .6H <sub>2</sub> O | 181 mg<br>(0.67 mmol)      | -                     | 270 mg<br>(1.00 mmol) | 270 mg<br>(1.00 mmol) | 540 mg<br>(2.00 mmol) | -                     | -                     |
| HF                                   | 0.15 mL                    | 0.15 mL               | 0.15 mL               | 0.15 mL               | 0.15 mL               | 0.15 mL               | 0.15 mL               |
| H <sub>3</sub> BTC                   | 420 mg<br>(2.00 mmol)      | 420 mg<br>(2.00 mmol) | 420 mg<br>(2.00 mmol) | 420 mg<br>(2.00 mmol) | 420 mg<br>(2.00 mmol) | 420 mg<br>(2.00 mmol) | 420 mg<br>(2.00 mmol) |
| H <sub>2</sub> O                     | 2.5 mL                     | 2.5 mL                | 2.5 mL                | 2.5 mL                | 2.5 mL                | 2.5 mL                | 2.5 mL                |
| DMF                                  | 35 mL                      | 35 mL                 | 35 mL                 | 35 mL                 | 35 mL                 | 35 mL                 | 35 mL                 |
| Ethanol                              | 2.5 mL                     | 2.5 mL                | 2.5 mL                | 2.5 mL                | 2.5 mL                | 2.5 mL                | 2.5 mL                |
| NF<br>(2 x 5 cm <sup>2</sup> )       | 1                          | 1                     | 1                     | 1                     | 1                     | 1                     | 1                     |
| Reaction Condition                   | 150 °C / 12 h              |                       |                       |                       |                       |                       |                       |
| Washing                              | H <sub>2</sub> O & ethanol |                       |                       |                       |                       |                       |                       |

**Table S2.** Comparison of Electrochemical performances of OER of FCN-BTC MOF with recently reported MOF based OER electrocatalysts in 1 M KOH.

| Electrocatalyst                                                                 | Substrate | $\eta$<br>(mV@<br>mA cm <sup>-2</sup> ) | b<br>(mV<br>dec <sup>-1</sup> ) | Stability<br>test, i-t<br>and/or V-t | Ref.         |
|---------------------------------------------------------------------------------|-----------|-----------------------------------------|---------------------------------|--------------------------------------|--------------|
| FCN-BTC MOF/NF                                                                  | NF        | 218@10<br>239@50<br>250@100             | 29.3                            | i-t,50<br>j@24h                      | Present work |
| (Ni <sub>2</sub> Co <sub>1</sub> ) <sub>0.925</sub> Fe <sub>0.075</sub> -MOF-NF | NF        | 257@10                                  | 41.3                            | i-t,10 j@35<br>h                     | 14           |
| FeNi <sub>3</sub> -BTC                                                          | NF        | 236@10<br>284@100                       | 49                              | i-t,10<br>j @15h                     | 46           |
| Fe-NiCoP/PBA HNCs                                                               | GC        | 290@10                                  | 70                              | V-t,10<br>j@40h                      | 47           |
| Ni <sub>0.82</sub> Co <sub>0.18</sub> O@C/NF                                    | NF        | 330@50                                  | 65                              | i-t,50 j@20<br>h                     | 48           |
| Fe-1-Co-1-MOF                                                                   | NF        | 233@10<br>248@50                        | 24.2                            | i-t,50 j@10<br>h                     | 49           |
| Ni-Fe LDH DSNCs                                                                 | CC        | 246@20                                  | 71                              | V-t,20<br>j@50 h;                    | 50           |

|                                                         |    |        |       |                     |    |
|---------------------------------------------------------|----|--------|-------|---------------------|----|
| NiCo <sub>2-x</sub> Fe <sub>x</sub> O <sub>4</sub> NBs  | GC | 274@10 | 42    | i-t,10,50<br>j@25 h | 51 |
| Fe <sub>1</sub> Co <sub>1</sub> Ni <sub>1</sub> @N-CNTs | GC | 249@10 | 43.47 | i-t,10 j@38<br>h    | 52 |

based OER electrocatalysts in 1 M KOH

$\eta$  = overpotential; b = Tafel slope; i-t = chronoamperometry; V-t = chronopotentiometry; j = mA cm<sup>-2</sup>; NF = nickel foam; GC = glassy carbon; CC = carbon cloth

Comparison of Electrochemical performances of OER of FCN-BTC MOF with recently reported MOF

**TableS3.** Atomic percentages obtained from ICP-OES analyses of MOFs removed from corresponding MOF/NF electrodes.

| MOF     | Atomic% |      |      | Ratio       |
|---------|---------|------|------|-------------|
|         | Fe      | Co   | Ni   |             |
| FCN-BTC | 4.20    | 4.08 | 4.43 | 1:0.97:1.05 |
| FC-BTC  | 6.33    | 3.48 | 2.27 | 1:0.55:0.36 |
| FN-BTC  | 5.53    | -    | 7.14 | 1:1.29      |
| CN-BTC  | -       | 4.86 | 7.56 | 1:1.56      |

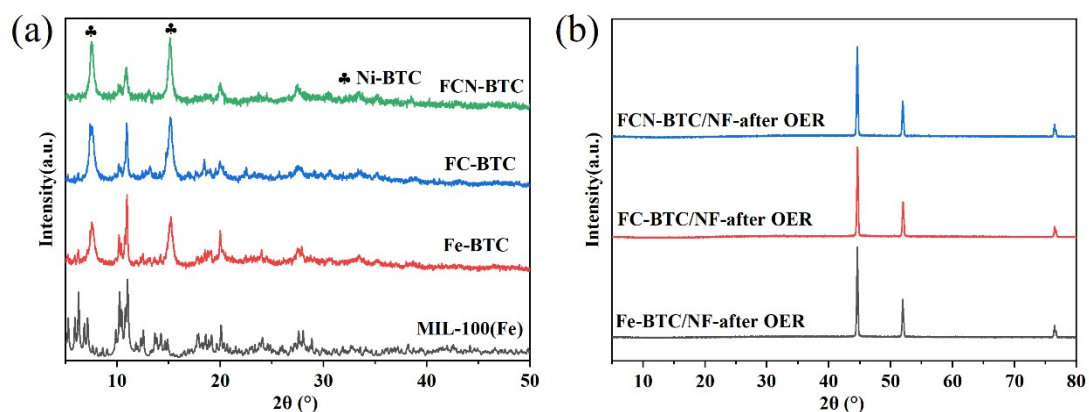

**Figure S1.** Powder XRD patterns of FCN-BTC MOF, FC-BTC MOF, Fe-BTC MOF (a) before and (b) XRD patterns after OER test.

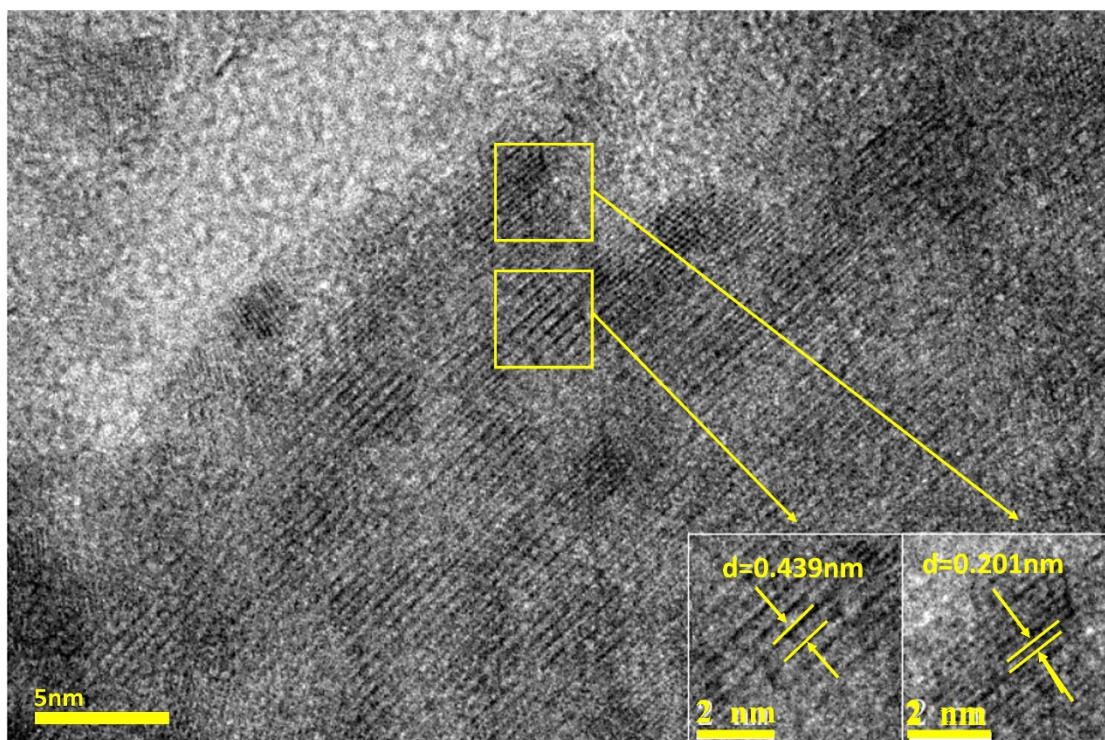

**Figure S2.** HR-TEM image FCN-BTC MOF before OER test.

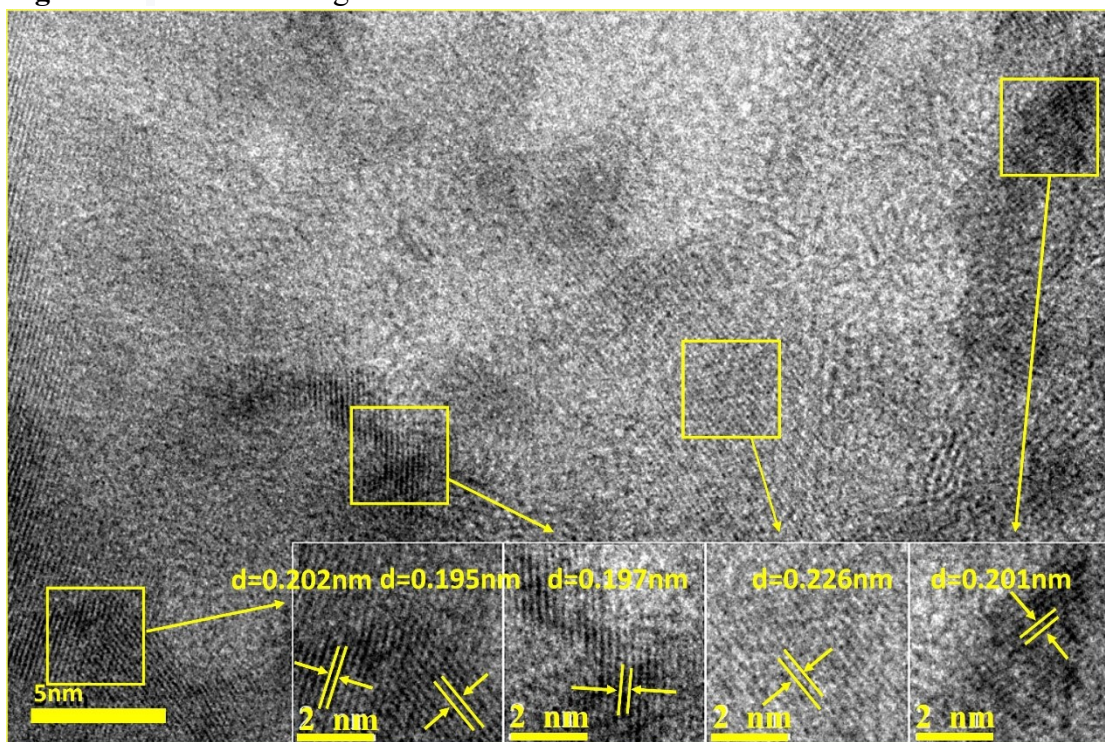

**Figure S3.** HR-TEM image FCN-BTC MOF after OER test.



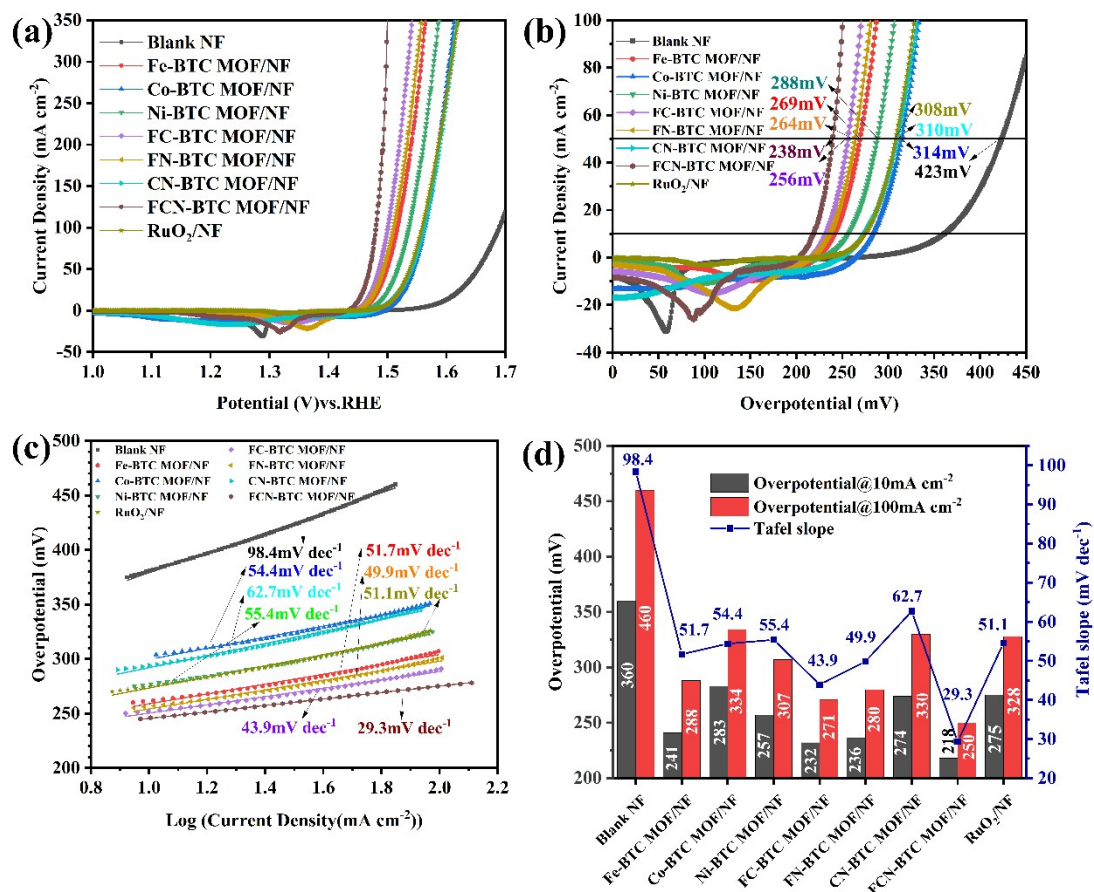

**Figure S4.** (a, b) LSV polarization curves recorded in 1 M KOH in negative scan mode at scan rate of 5 mV s<sup>-1</sup>. (c) Tafel plots and (d) composite comparison of overpotential at 10, 100 mA cm<sup>-2</sup> current density and Tafel slope.

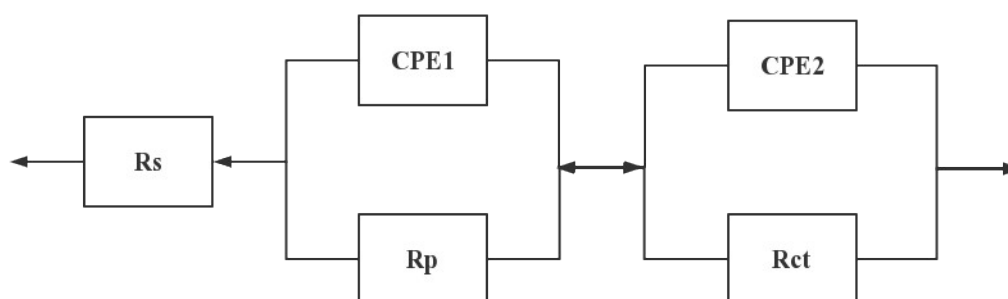

**Figure S5.** Equivalent circuit model for electrochemical impedance spectroscopy analysis of OER.  $R_s$ ,  $R_p$ , and  $R_{ct}$  represent system, electrode porosity, and charge transfer resistances, respectively, whereas  $CPE_1$  and  $CPE_2$  represent constant phase element.

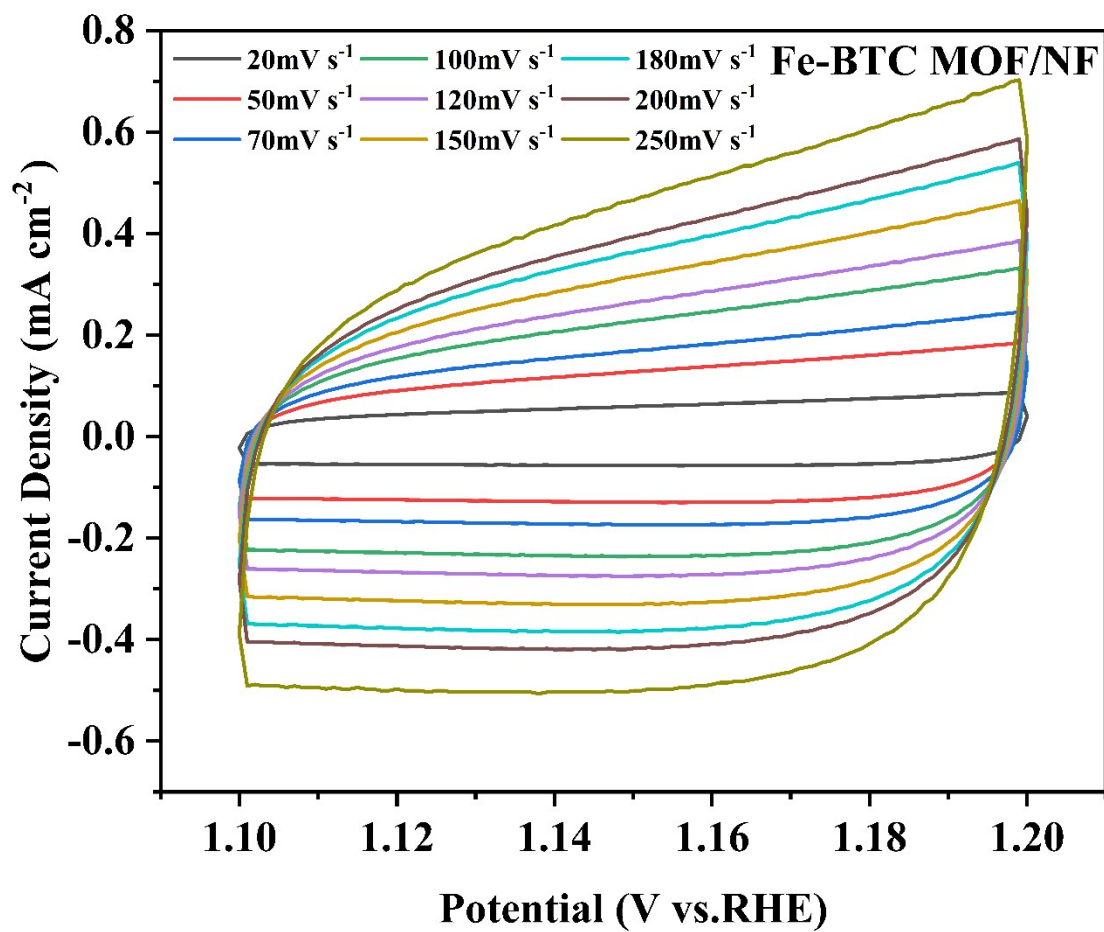

Figure S6. CV curves of Fe-BTC MOF/NF at increasing scan rates ( $\text{mV s}^{-1}$ ).

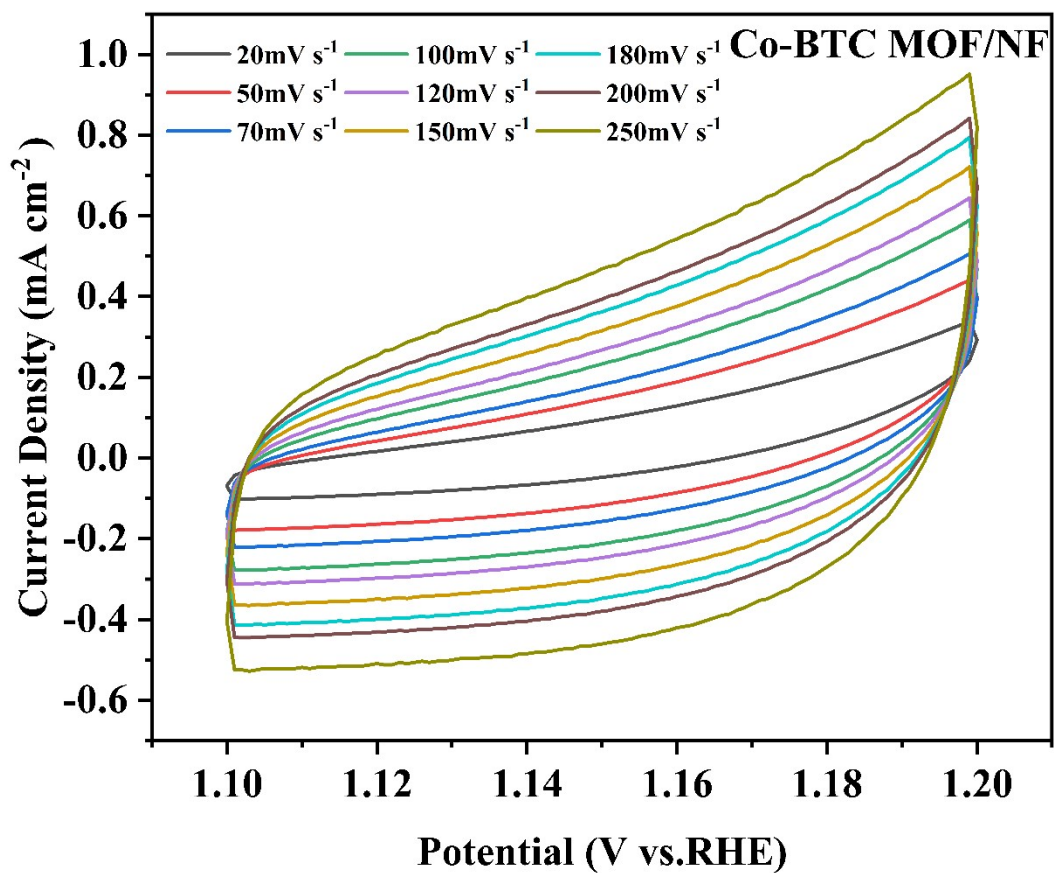

Figure S7. CV curves of Co-BTC MOF/NF at increasing scan rates ( $\text{mV s}^{-1}$ ).

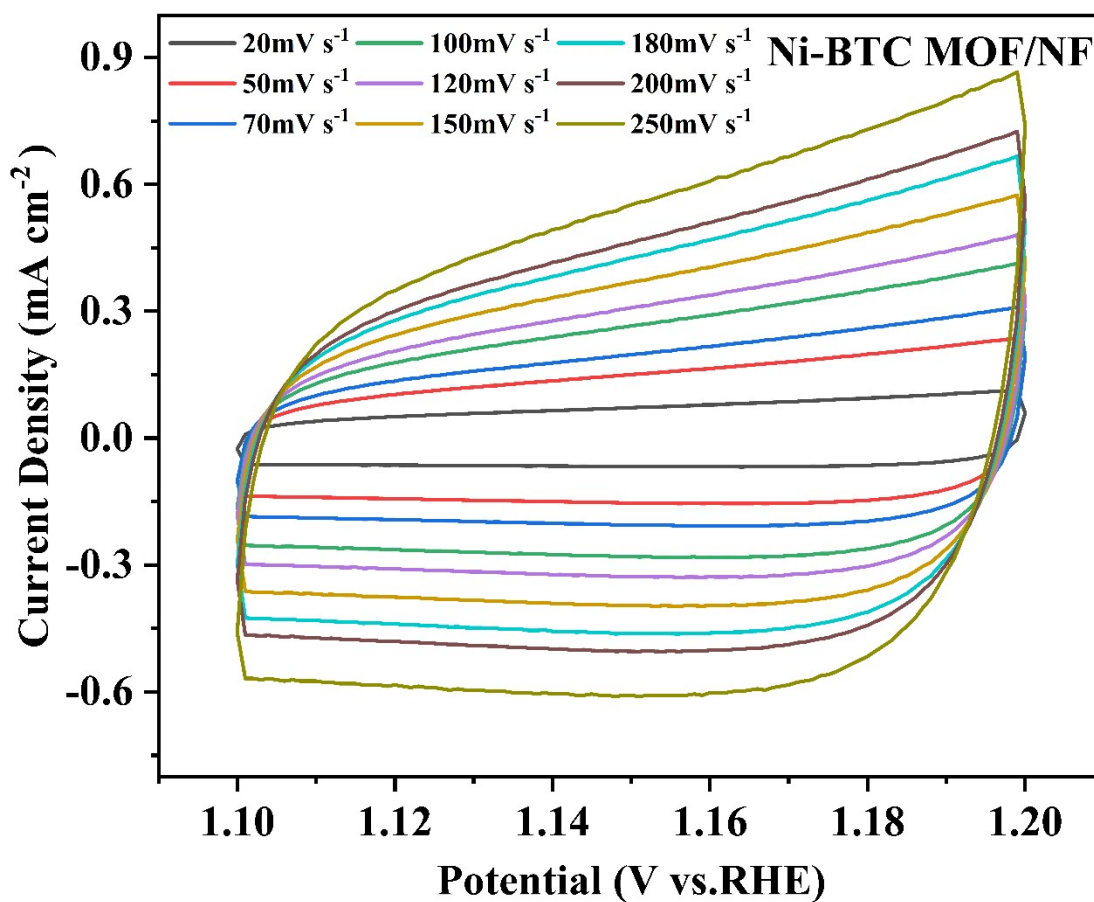

Figure S8. CV curves of Ni-BTC MOF/NF at increasing scan rates ( $\text{mV s}^{-1}$ ).

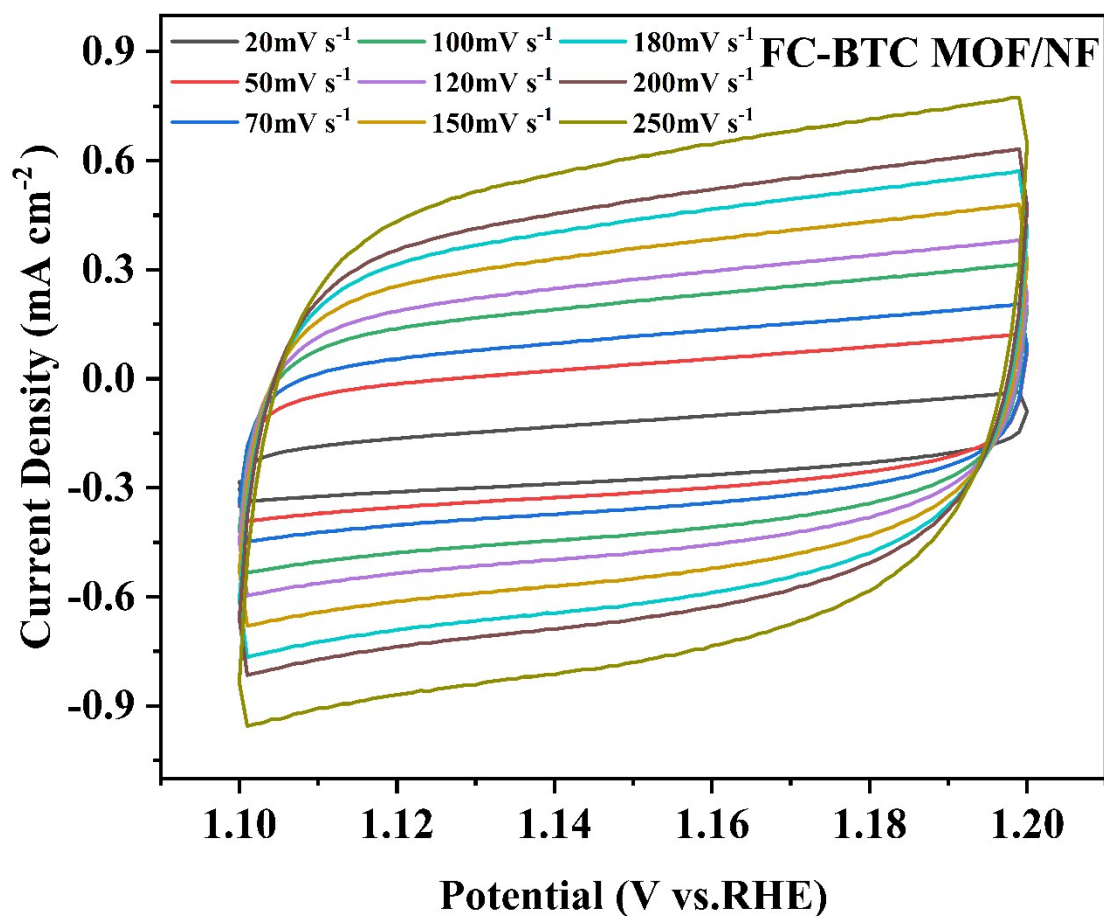

Figure S9. CV curves of FC-BTC MOF/NF at increasing scan rates ( $\text{mV s}^{-1}$ ).

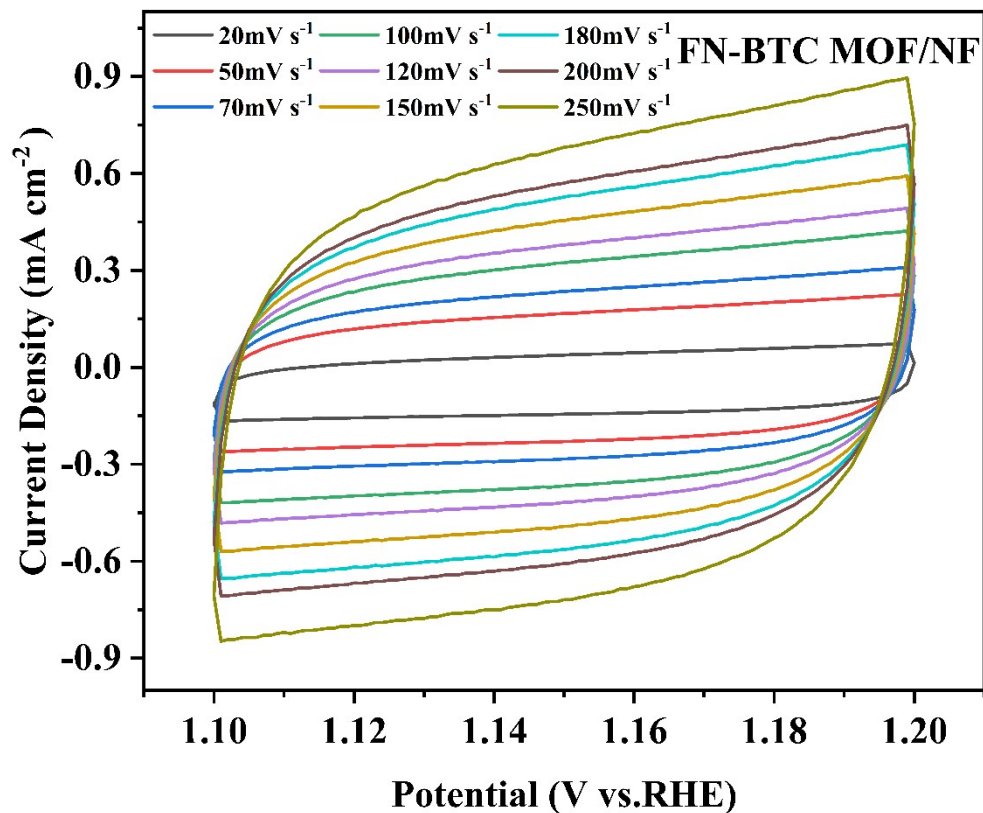



Figure S10. CV curves of FN-BTC MOF/NF at increasing scan rates ( $\text{mV s}^{-1}$ ).

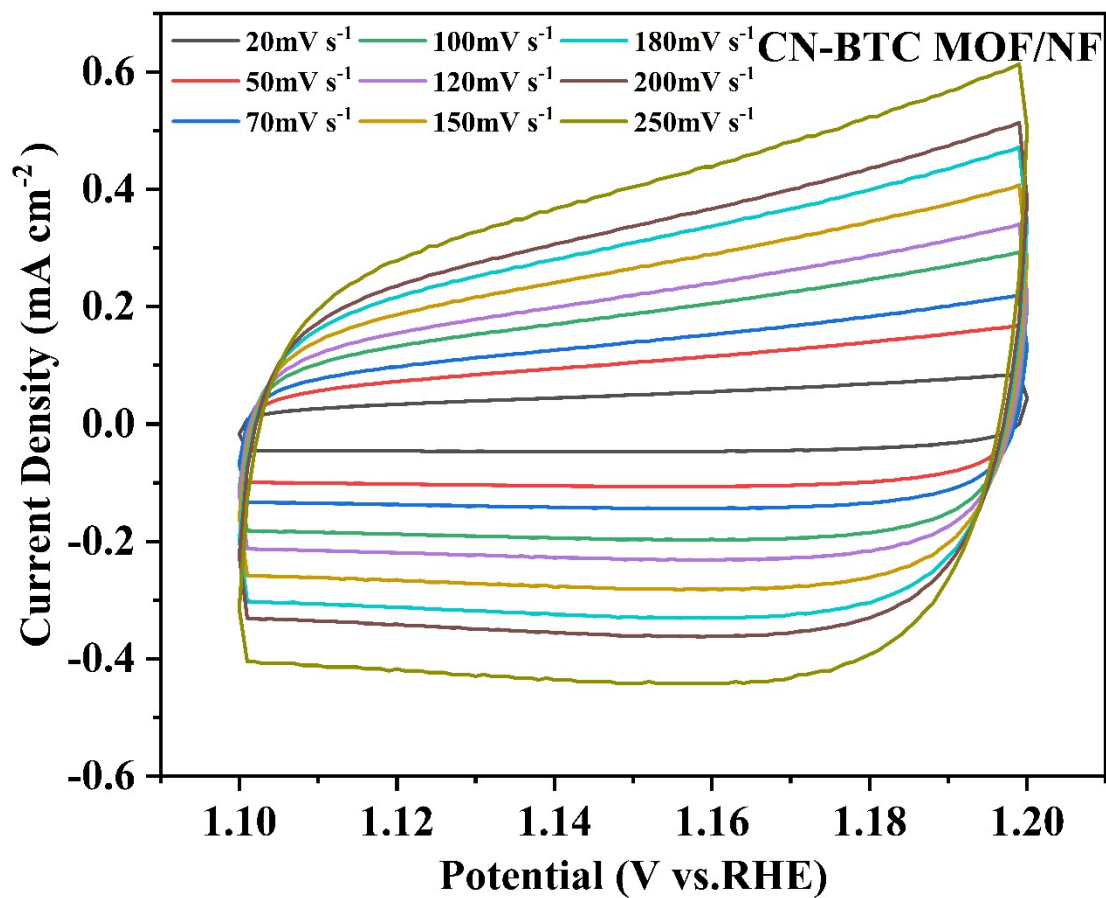

Figure S11. CV curves of CN-BTC MOF/NF at increasing scan rates ( $\text{mV s}^{-1}$ ).

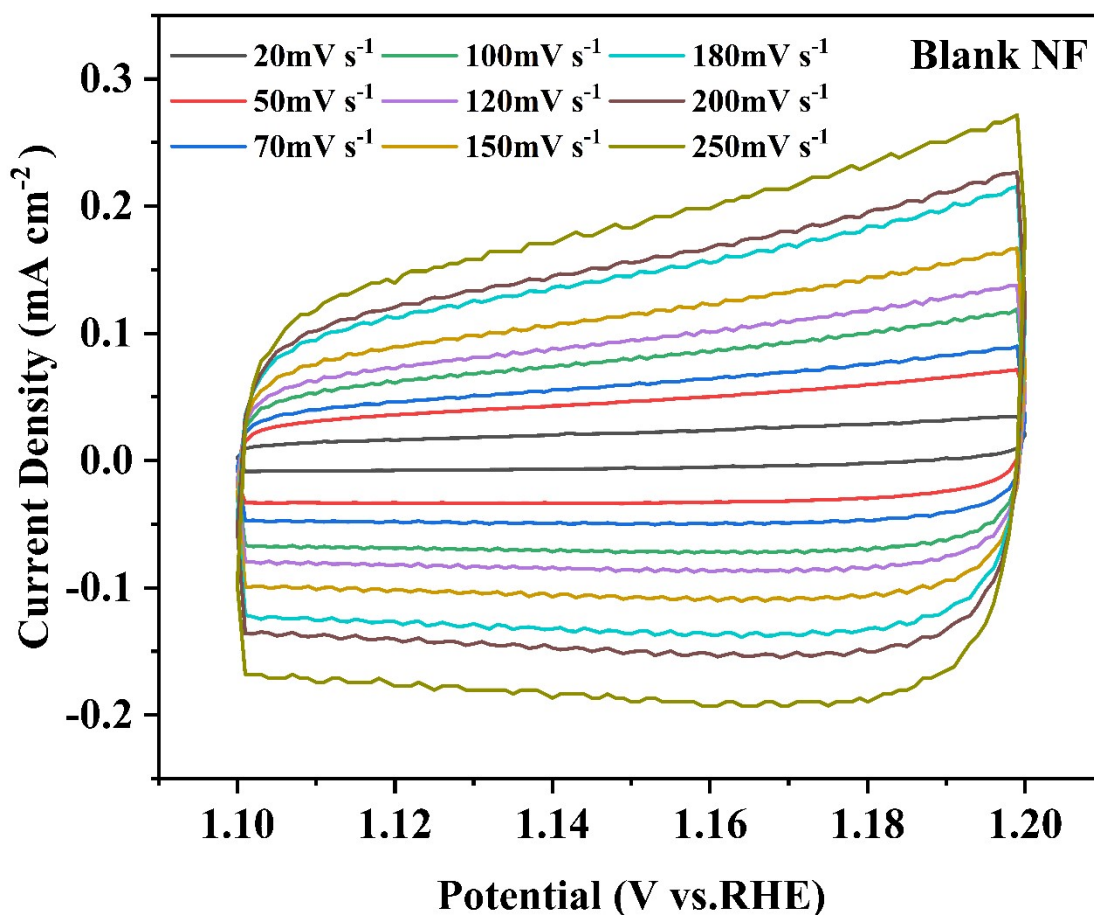

Figure S12. CV curves of Blank NF at increasing scan rates ( $\text{mV s}^{-1}$ ).

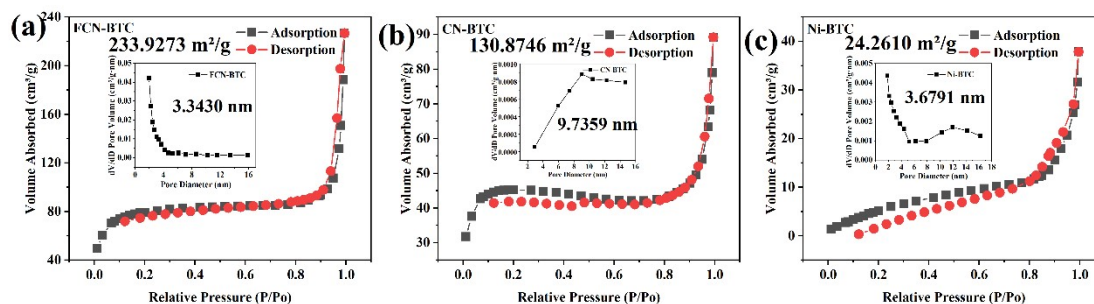

Figure S13.  $\text{N}_2$  adsorption-desorption isotherms of (a)FCN-BTC MOF, (b)CN-BTC MOF, and (c)Ni-BTC MOF, illustrated by BJH adsorption curves.

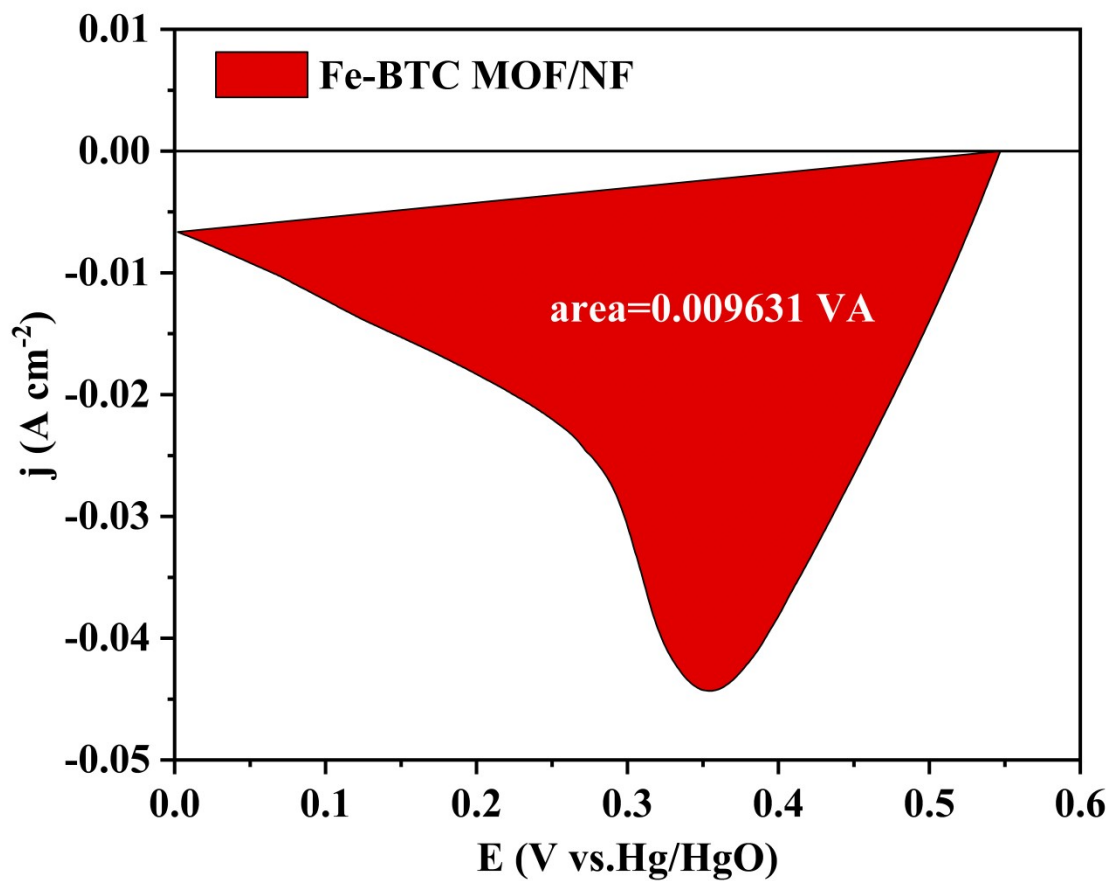

**Figure S14.** Reduction Peak area of CV curves ( $100\text{mV s}^{-1}$ ) in 1 M KOH for Fe-BTC MOF/NF electrodes.

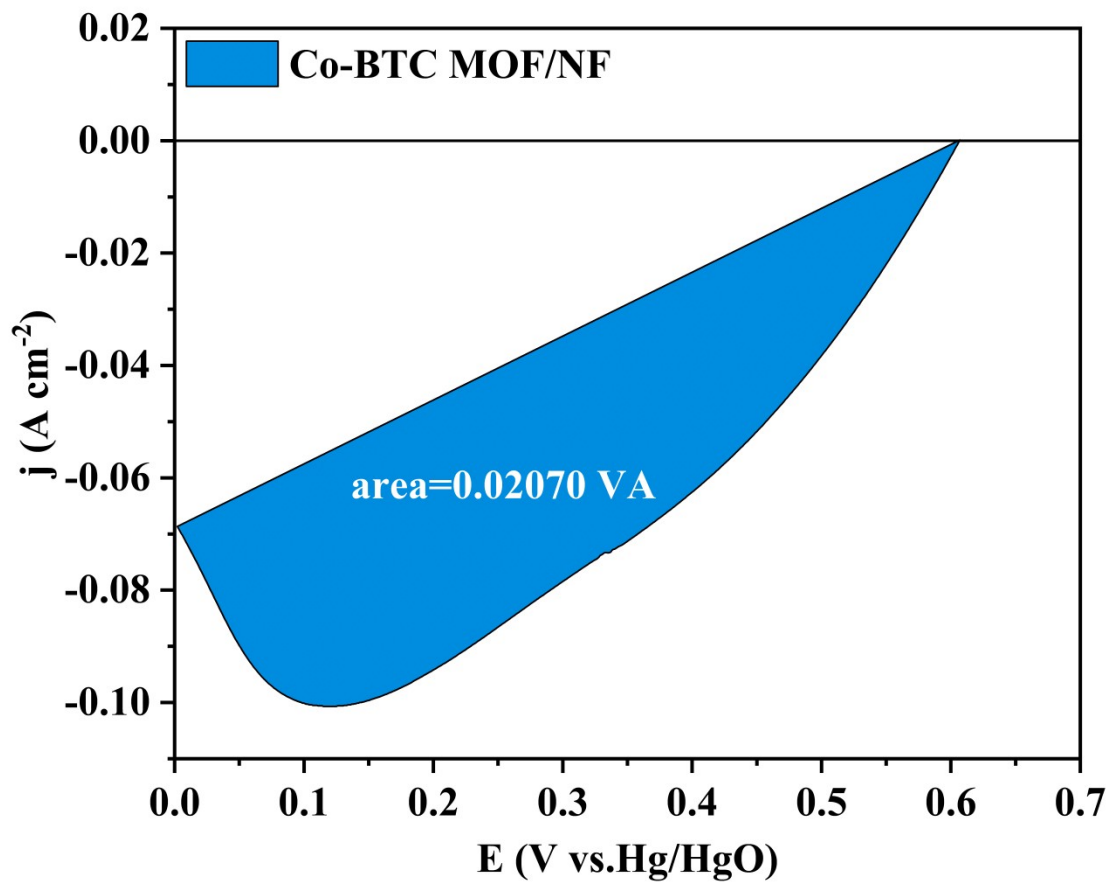

**Figure S15.**Reduction Peak area of CV curves ( $100\text{mV s}^{-1}$ ) in 1 M KOH for Co-BTC MOF/NF electrodes.



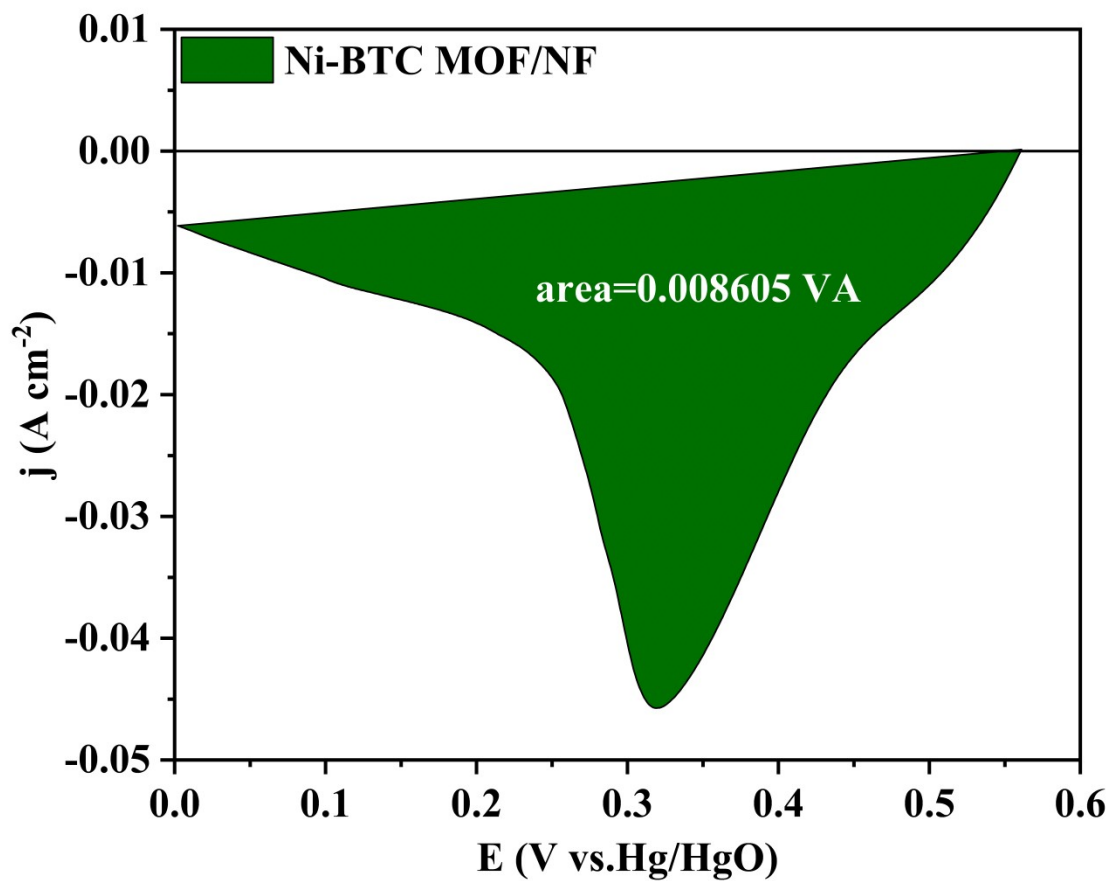

**Figure S16.**Reduction Peak area of CV curves ( $100\text{mV s}^{-1}$ ) in 1 M KOH for Ni-BTC MOF/NF electrodes.

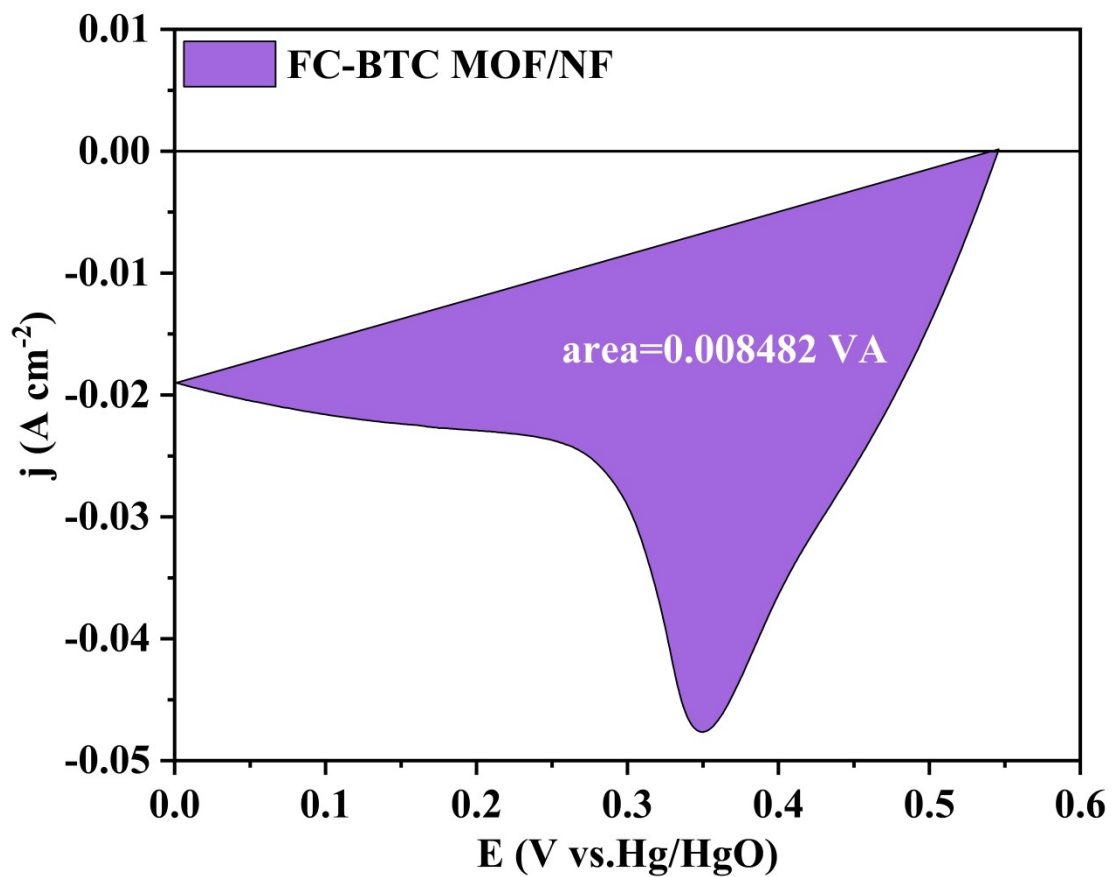

**Figure S17.**Reduction Peak area of CV curves ( $100\text{mV s}^{-1}$ ) in 1 M KOH for FC-BTC MOF/NF electrodes.

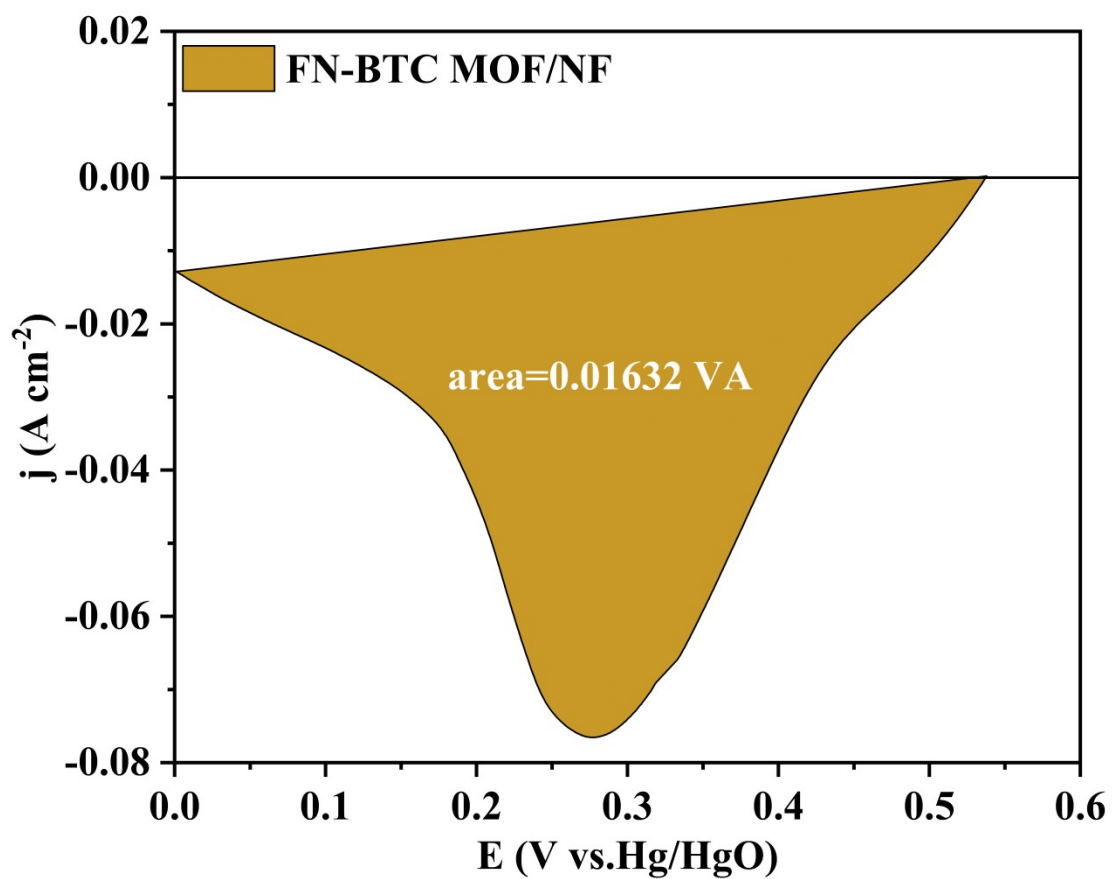

**Figure S18.**Reduction Peak area of CV curves ( $100\text{mV s}^{-1}$ ) in 1 M KOH for FN-BTC MOF/NF electrodes.

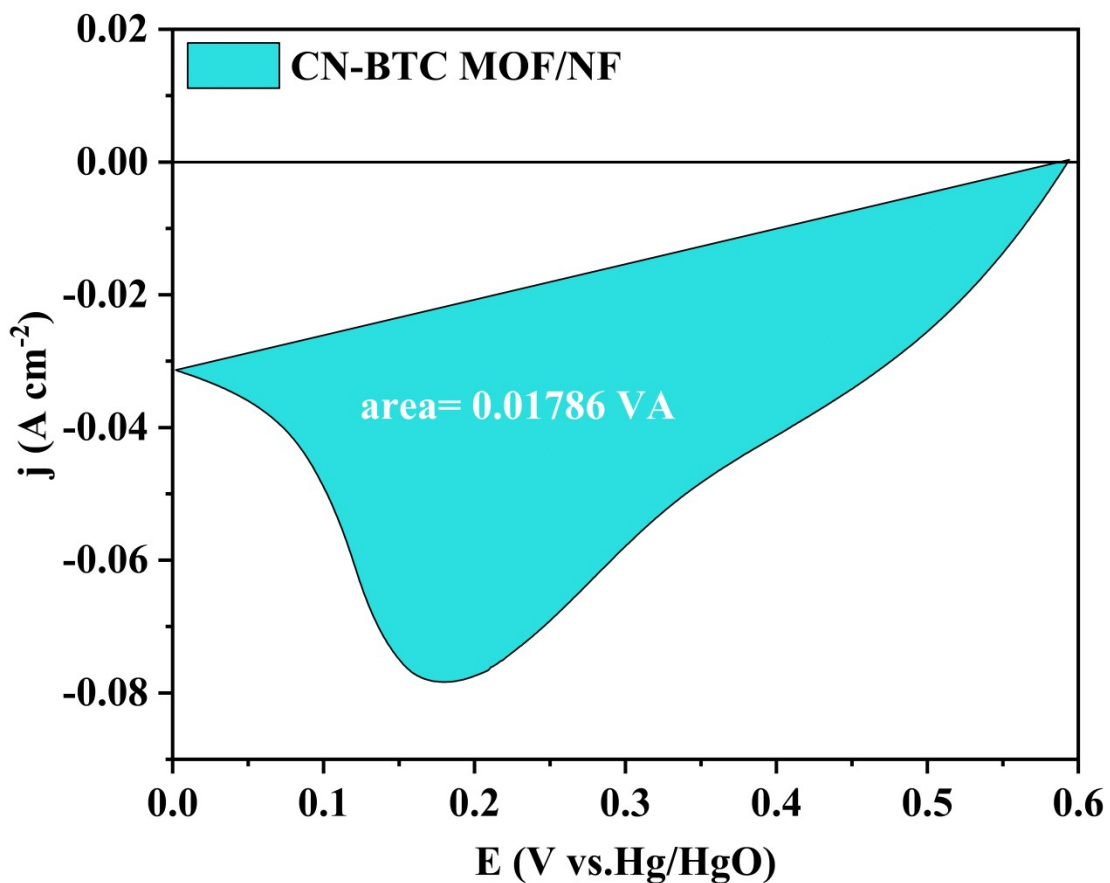

**Figure S19.**Reduction Peak area of CV curves ( $100\text{mV s}^{-1}$ ) in 1 M KOH for CN-BTC MOF/NF electrodes.

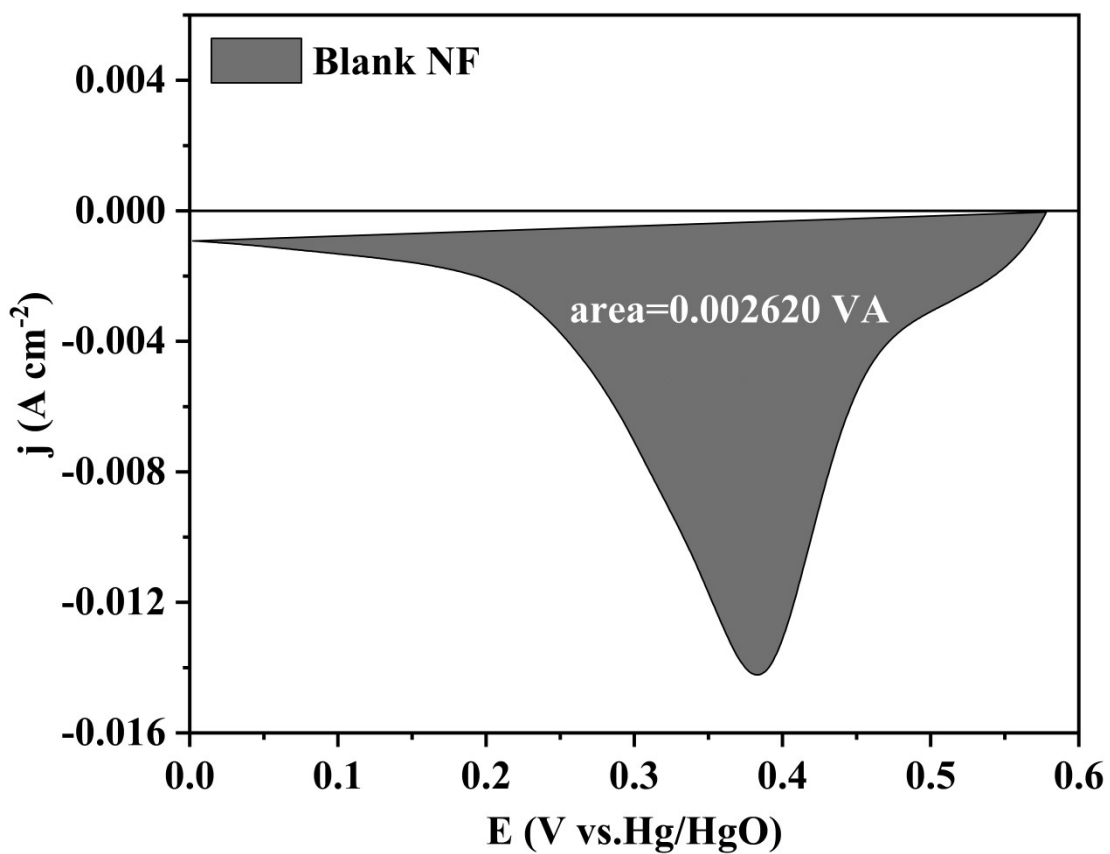



**Figure S20.** Reduction Peak area of CV curves ( $100\text{mV s}^{-1}$ ) in 1 M KOH for Blank NF electrodes.

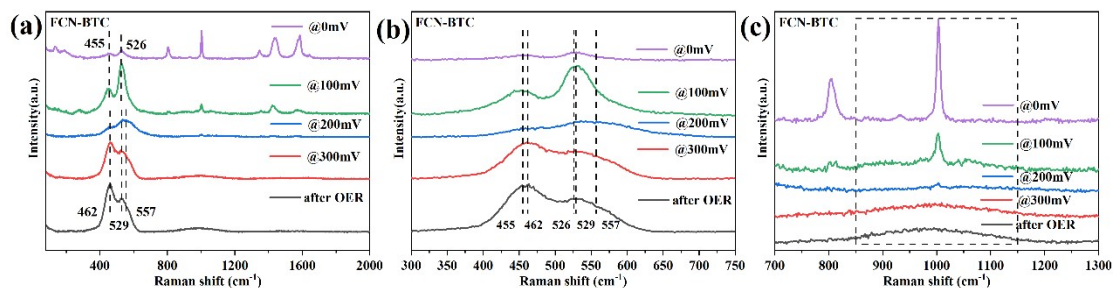

**Figure S21.** (a) In-situ Raman spectra for FCN-BTCMOF with 532 nm excitation under OER conditions at increasing overpotentials (vs. RHE); (b) Magnification of the corresponding wavelength ( $300\text{-}750\text{ cm}^{-1}$ ) region of (a); (c) Magnification of the corresponding wavelength ( $700\text{-}1300\text{ cm}^{-1}$ ) region of (a).

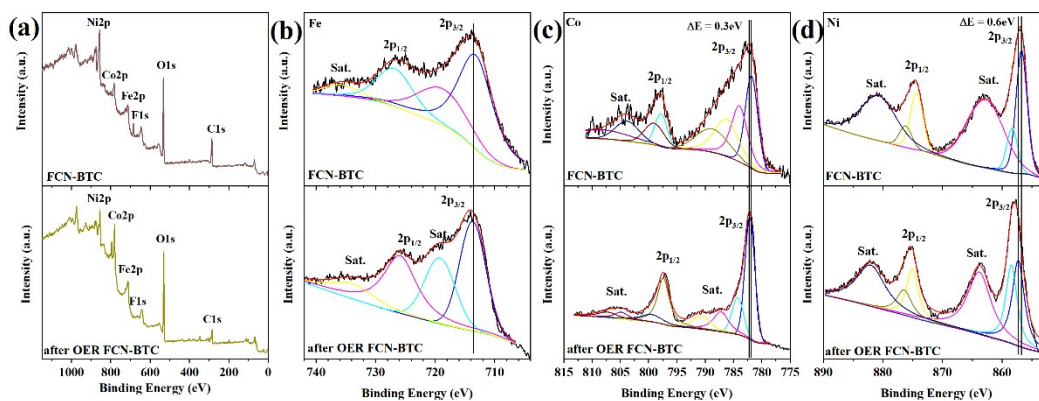

**Figure S22.** FCN-BTC MOF before and after OER test: (a) XPS full survey, (b) Fe 2p, (c) Co 2p, (d) Ni 2p.
